# Supplementary material for: Meso- and microporous soft templated hydrothermal carbons for dye removal from water
Source: Royal Society of Chemistry journal article supplement (doi:10.1039/c5gc01796c), 2015-10-05
Supplement: c5gc01796c1.pdf [file c5gc01796c1.pdf]

# Meso- and microporous soft templated hydrothermal carbons for dye removal from water

Sara-Maaria Alatalo<sup>a\*</sup>, Ermei Mäkilä<sup>c</sup>, Eveliina Repo<sup>a</sup>, Markku Heinonen<sup>d</sup>, Jarno Salonen<sup>c</sup>, Edwin Kukk<sup>d</sup>, Mika Sillanpää<sup>a</sup> and Maria-Magdalena Titirici<sup>b\*</sup>

<sup>a</sup> Laboratory of Green Chemistry, School of Engineering Science, Lappeenranta University of Technology, Sammonkatu 12, FI-50130 Mikkeli, Finland

<sup>b</sup> School of Materials Science and Engineering, Queen Mary University of London, Mile End Road, E1 4NS, London, United Kingdom

<sup>c</sup> Laboratory of Industrial Physics, Department of Physics and Astronomy, University of Turku, FI-20014 Turku, Finland

<sup>d</sup> Materials Research Laboratory, Department of Physics and Astronomy, University of Turku, FI-20014 Turku, Finland

---

\*E-mail: sara-maaria.alatalo@lut.fi, m.m.titirici@qmul.ac.uk (Corresponding author)

## Supporting information

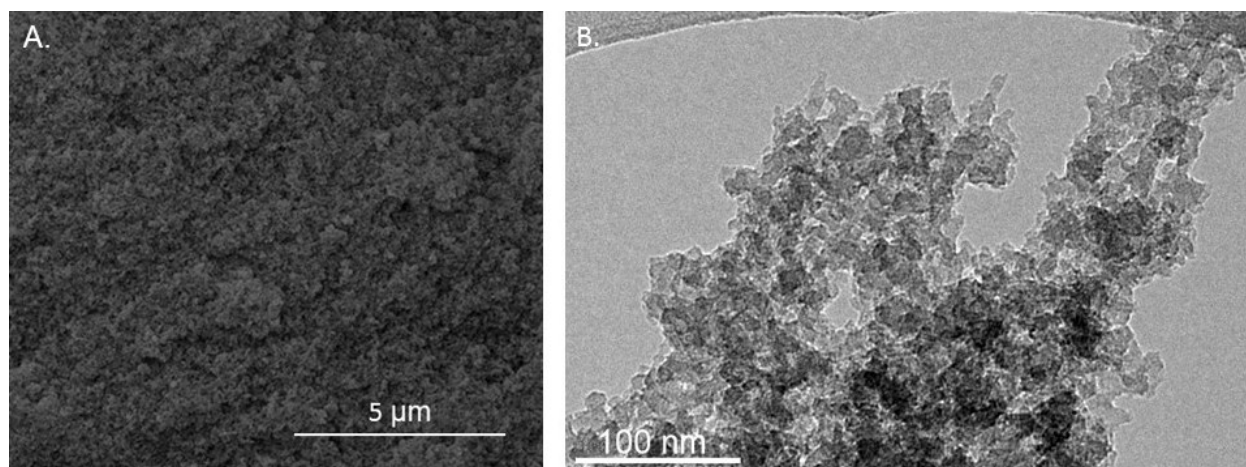

S1. A. SEM 20 k magnification and B. TEM 60 k magnification images of Fruli+TCA

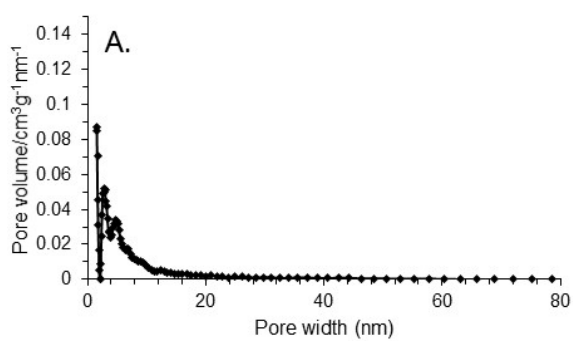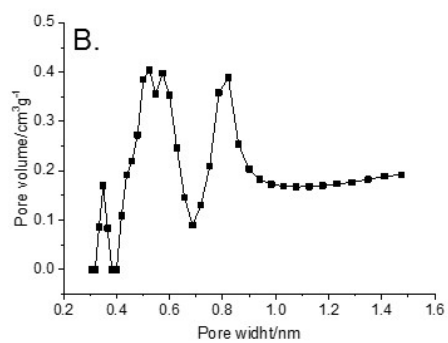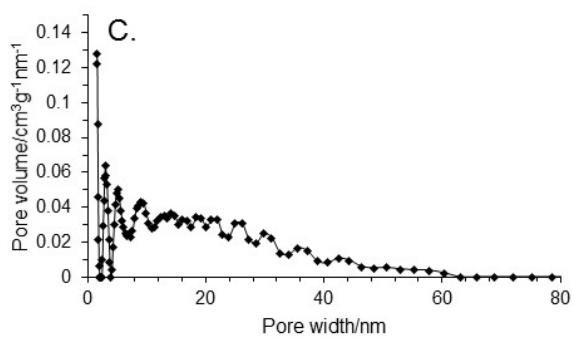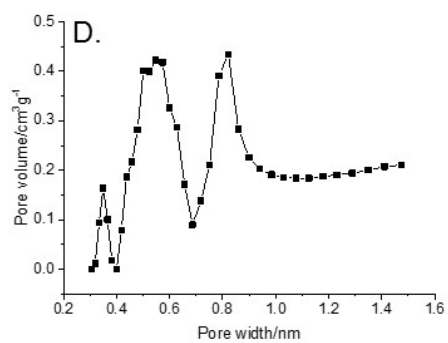

S2. FruLi pore size distribution from A. N<sub>2</sub> sorption data calculated with NLDFT assuming slit shaped pores and B. CO<sub>2</sub> sorption data calculated with NLDFT. FruLi+TCA pore size distributions from C. N<sub>2</sub> sorption data and D. CO<sub>2</sub> sorption data.

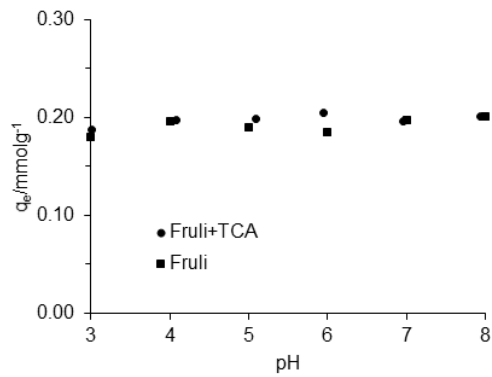

S3. Effect of solution pH on the adsorption capacity of Methylene blue FruLi (■) and FruLi+TCA (●). Dye concentration 0.4 mM, adsorption temperature 20 °C and stirring speed 200 rpm, equilibrium time 24 h, amount of adsorbent 20 mg and dye solution volume 10 ml.

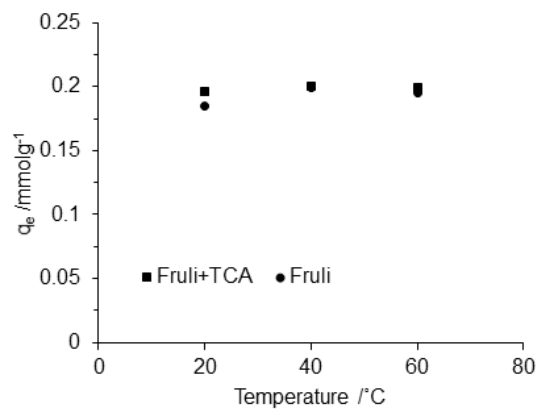

S4. Effect of adsorption temperature on the adsorption capacity of Methylene blue Fruli (■) and Fruli+TCA (●). Dye concentration 0.4 mM and stirring speed 200 rpm, reaction time 24 h and equilibrium time 24 h.

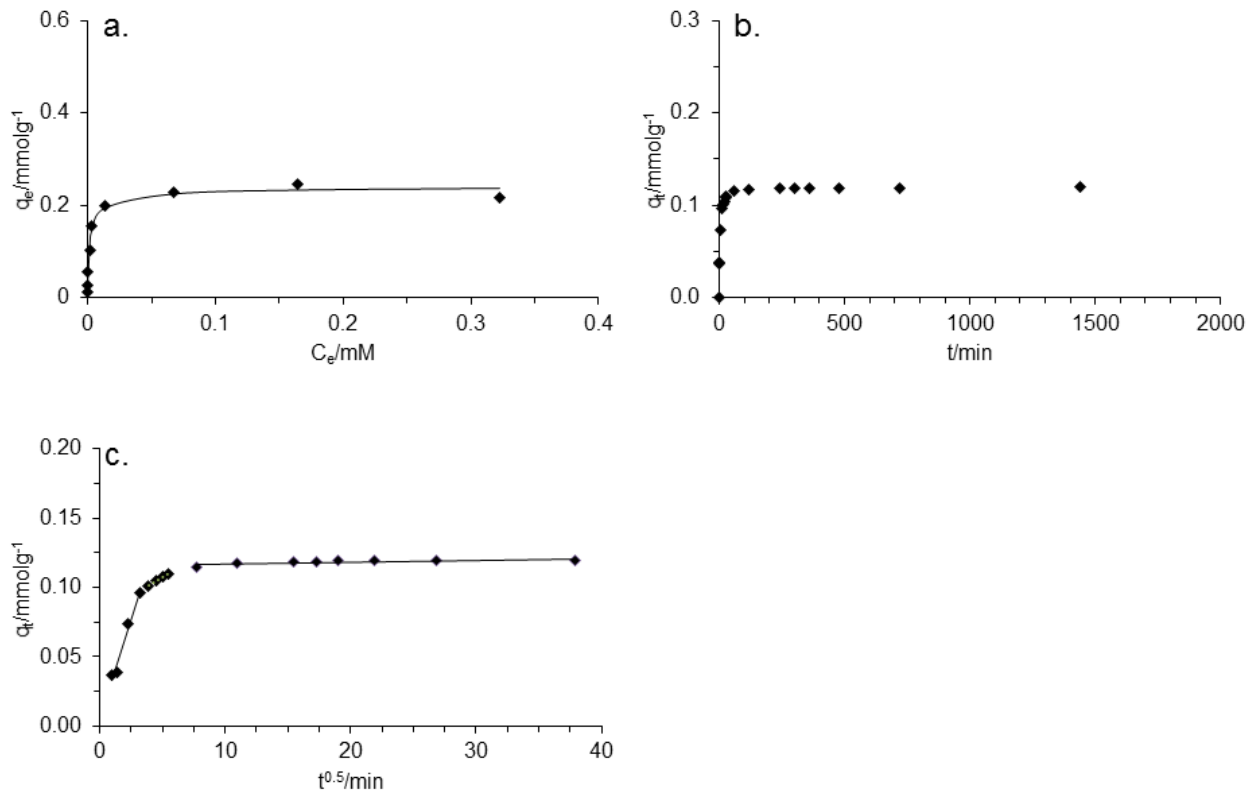

S5. A. Experimental adsorption equilibrium results and Sips adsorption isotherm (—) Fruli+TCA Methylene Blue (■) B. Experimental kinetic data and C. Intraparticle diffusion modeling methylene blue adsorption.

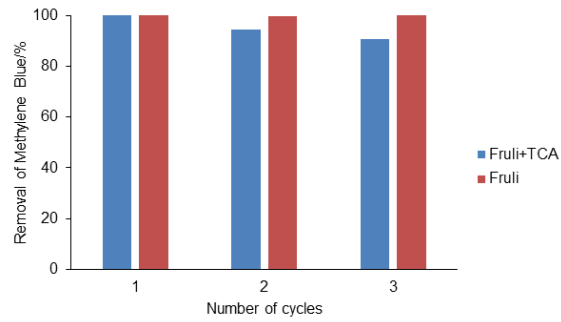

S6. Desorption of Methylene Blue from the carbon Fruli and Fruli+TCA. Adsorption efficiency of carbon materials after regeneration up to three cycles.

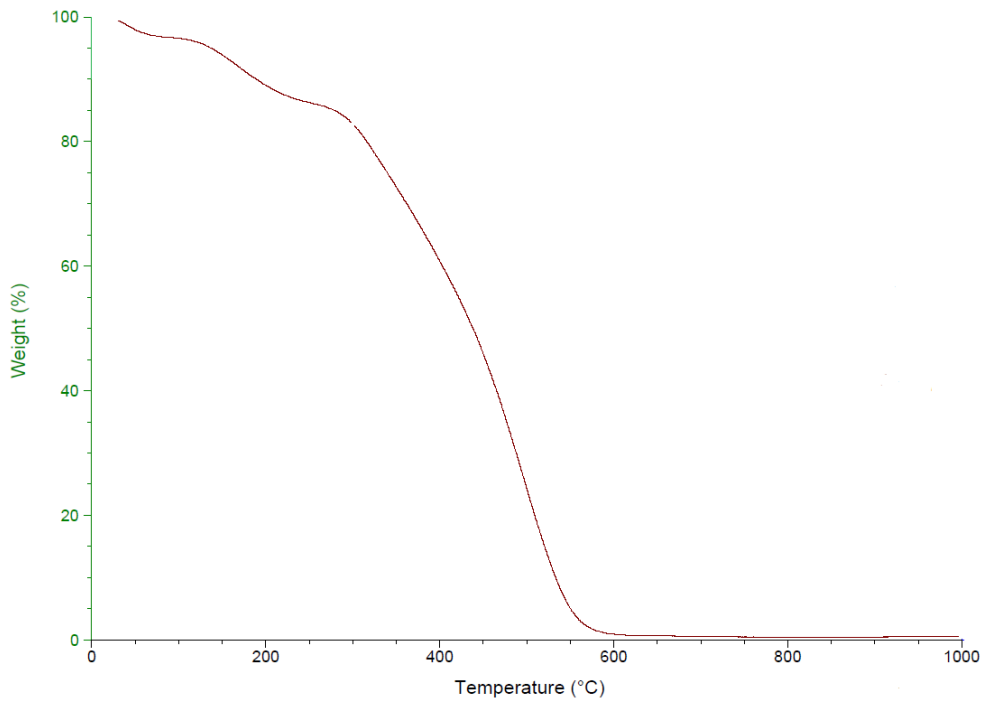

S7. Thermogravimetric analysis of salt templated carbon under air.
